# Supplementary material
Source: publisher figshare collection journal article supplement (https://diabetesjournals.figshare.com/articles/dataset/_/13235543)

**Supplemental Table 1. Baseline characteristics by baseline glycemic subgroup**

|                                                   | <b>No Diabetes<br/>N=2,605</b> | <b>Pre-diabetes<br/>N=1,748</b> | <b>Normoglycemic<br/>N=857</b> | <b>p-value</b> |
|---------------------------------------------------|--------------------------------|---------------------------------|--------------------------------|----------------|
| <b>Age – yr</b>                                   | 66.2±11.6                      | 67.1±11.1                       | 64.5±12.5                      | <0.001         |
| <b>Sex - no (%)</b>                               |                                |                                 |                                | 0.44           |
| Female                                            | 632 (24.3)                     | 432 (24.7)                      | 200 (23.3)                     |                |
| Male                                              | 1,973 (75.7)                   | 1,316 (75.3)                    | 657 (76.7)                     |                |
| <b>Race – no. (%)†</b>                            |                                |                                 |                                | 0.77           |
| White                                             | 1,844 (70.8)                   | 1,242 (71.1)                    | 602 (70.2)                     |                |
| Asian                                             | 625 (24.0)                     | 419 (24.0)                      | 206 (24.0)                     |                |
| Black or African American                         | 98 ( 3.8)                      | 61 ( 3.5)                       | 37 ( 4.3)                      |                |
| Other                                             | 38 ( 1.5)                      | 26 ( 1.5)                       | 12 ( 1.4)                      |                |
| <b>Region – no. (%)</b>                           |                                |                                 |                                | 0.063          |
| Asia/Pacific                                      | 617 (23.7)                     | 413 (23.6)                      | 204 (23.8)                     |                |
| Europe                                            | 1,203 (46.2)                   | 833 (47.7)                      | 370 (43.2)                     |                |
| North America                                     | 342 (13.1)                     | 226 (12.9)                      | 116 (13.5)                     |                |
| South America                                     | 443 (17.0)                     | 276 (15.8)                      | 167 (19.5)                     |                |
| <b>Body-mass index§</b>                           | 27.2±5.7                       | 27.4±5.8                        | 26.8±5.6                       | 0.023          |
| <b>HbA1c – %</b>                                  | 5.8±0.4                        | 6.0±0.3                         | 5.3±0.2                        | <0.001         |
| <b>Estimated GFR</b>                              |                                |                                 |                                |                |
| Mean – ml/min/1.73m <sup>2</sup>                  | 67.8±19.2                      | 67.1±18.8                       | 69.2±20.0                      | 0.010          |
| Rate of < 60 ml/min/1.73m <sup>2</sup> – no. (%)  | 944 (36.3)                     | 643 (36.8)                      | 301 (35.2)                     | 0.43           |
| <b>Systolic Blood Pressure – mmHg</b>             | 120.6±16.1                     | 120.5±15.8                      | 120.7±16.7                     | 0.84           |
| <b>NYHA functional classification – no. (%)</b>   |                                |                                 |                                | 0.048          |
| II                                                | 1,841 (70.7)                   | 1,232 (70.5)                    | 609 (71.1)                     |                |
| III                                               | 743 (28.5)                     | 507 (29.0)                      | 236 (27.5)                     |                |
| IV                                                | 21 (0.8)                       | 9 (0.5)                         | 12 (1.4)                       |                |
| <b>Left ventricular ejection fraction – %</b>     | 30.9±6.9                       | 30.9±6.9                        | 31.0±6.8                       | 0.83           |
| <b>Median NT-proBNP (IQR) – pg/ml</b>             | 1412.8 (828.0-2492.5)          | 1438.7 (832.1-2615.8)           | 1360.2 (819.0-2341.6)          | 0.094          |
| <b>Median KCCQ-TSS (IQR)</b>                      | 79.2 (61.5-91.7)               | 79.2 (60.4-91.7)                | 79.2 (62.5-93.8)               | 0.11           |
| <b>Principal cause of heart failure – no. (%)</b> |                                |                                 |                                | 0.013          |
| Ischemic                                          | 1,341 (51.5)                   | 935 (53.5)                      | 406 (47.4)                     |                |
| Non-ischemic                                      | 1,033 (39.7)                   | 666 (38.1)                      | 367 (42.8)                     |                |
| Unknown                                           | 231 (8.9)                      | 147 (8.4)                       | 84 (9.8)                       |                |
| <b>Medical history – no. (%)</b>                  |                                |                                 |                                |                |
| Prior hospitalization for heart failure           | 1,202 (46.1)                   | 789 (45.1)                      | 413 (48.2)                     | 0.14           |
| Atrial fibrillation                               | 1,022 (39.2)                   | 700 (40.0)                      | 322 (37.6)                     | 0.22           |
| <b>Heart failure medication– no (%)</b>           |                                |                                 |                                |                |
| Diuretic                                          | 2,124 (81.5)                   | 1,453 (83.1)                    | 671 (78.3)                     | 0.003          |
| ACE-inhibitor                                     | 1,489 (57.2)                   | 1,012 (57.9)                    | 477 (55.7)                     | 0.28           |
| ARB                                               | 692 (26.6)                     | 463 (26.5)                      | 229 (26.7)                     | 0.90           |
| Sacubitril-valsartan                              | 279 (10.7)                     | 178 (10.2)                      | 101 (11.8)                     | 0.21           |
| Beta-blocker                                      | 2,491 (95.6)                   | 1,674 (95.8)                    | 817 (95.3)                     | 0.61           |
| Mineralocorticoid receptor antagonist             | 1,841 (70.7)                   | 1,233 (70.5)                    | 608 (70.9)                     | 0.83           |
| Digitalis                                         | 458 (17.6)                     | 304 (17.4)                      | 154 (18.0)                     | 0.72           |
| Statin                                            | 1,607 (61.7)                   | 1,143 (65.4)                    | 464 (54.1)                     | <0.001         |

P values presented are for the comparison between prediabetes and normoglycemia.

Data presented as mean (SD) unless otherwise indicated.

Percentages may not total 100 because of rounding.

ACE denotes angiotensin-converting enzyme, ARB angiotensin-receptor blocker, GFR glomerular filtration rate, IQR interquartile range, LVEF left ventricular ejection fraction, MRA mineralocorticoid receptor antagonist, N-terminal pro-B-type natriuretic peptide and NYHA New York Heart Association. KCCQ-TSS Kansas City Cardiomyopathy Questionnaire total symptom score - range from 0 to 100, with higher scores indicating fewer symptoms and physical limitations associated with heart failure. A score of 75 or above is considered to reflect satisfactory health status.

† Race was reported by the investigators

§ The body-mass index is the weight in kilograms divided by the square of the height in meters.

## Supplemental Figure 1. Effect of dapagliflozin on incident diabetes by relevant subgroups

No heterogeneity of the treatment effect on incident T2D was found except for nominal interactions for age and baseline NT-proBNP.

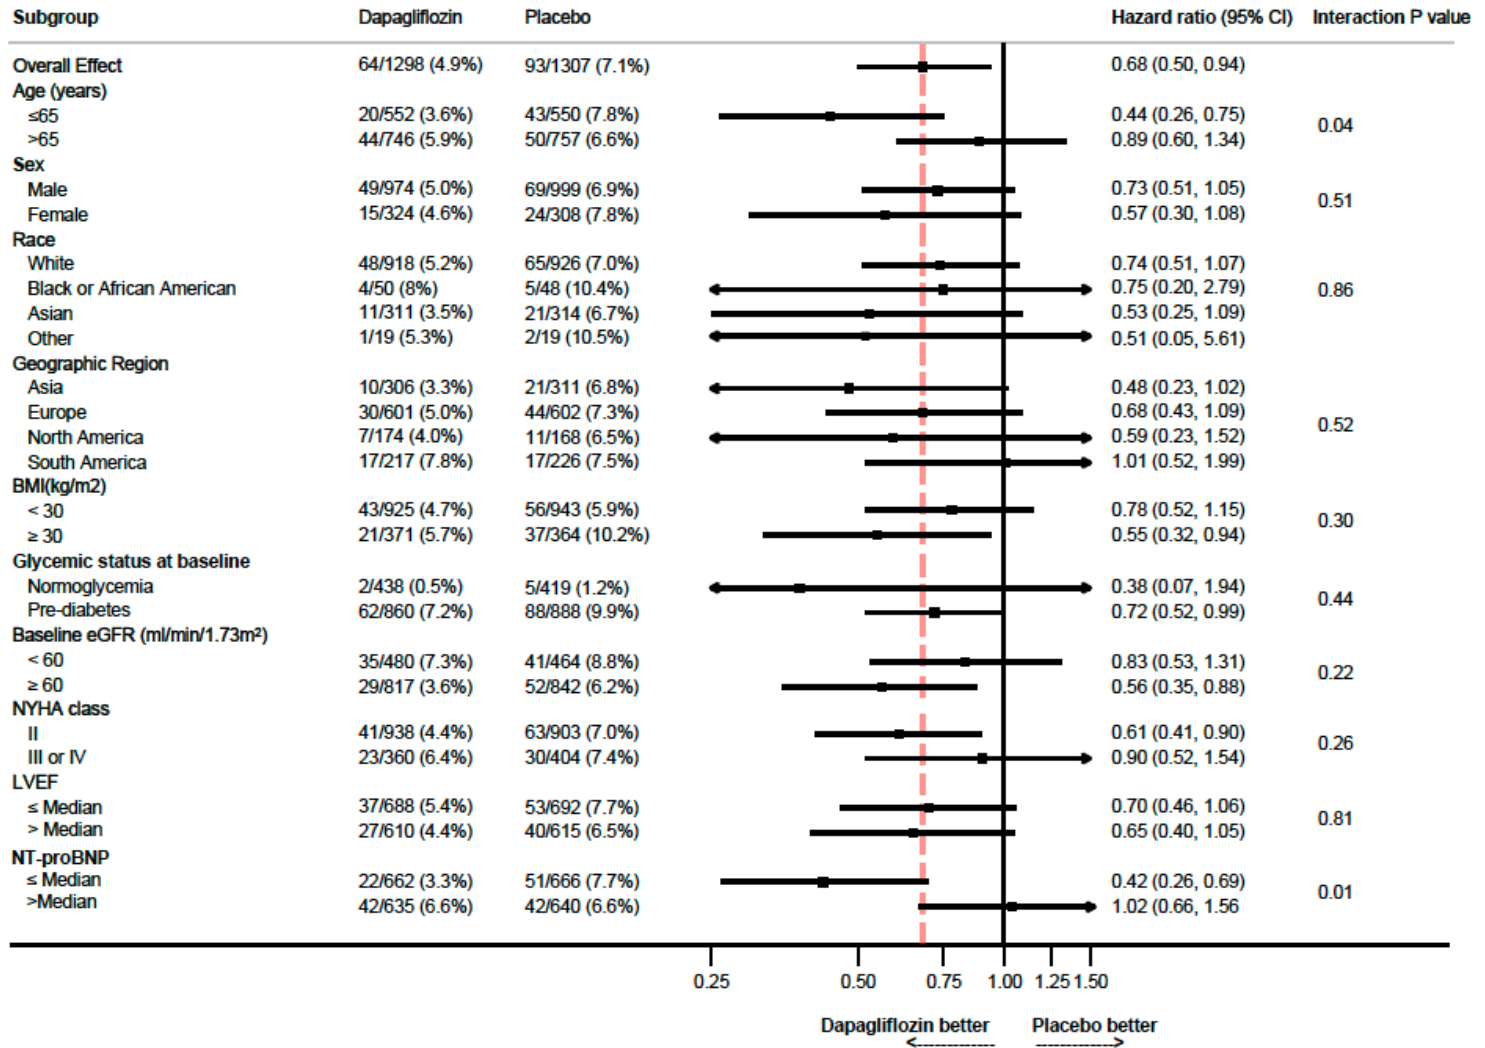

Supplement: Supplementary file 1 [file 1]
