# Supplementary material
Source: publisher figshare collection journal article supplement (https://diabetesjournals.figshare.com/articles/dataset/_/13235543)
Supplement: Supplementary file 2 [file 1]

## EXECUTIVE COMMITTEE

John J.V. McMurray M.D. (Chairman), BHF Cardiovascular Research Centre, University of Glasgow, Glasgow, UK;

David L. DeMets Ph.D., Department of Biostatistics and Medical Informatics, University of Wisconsin, Madison, WI USA;

Silvio E Inzucchi M.D., Section of Endocrinology, Yale School of Medicine, New Haven CT, USA

Lars Køber M.D., DMSc, Rigshospitalet Copenhagen University Hospital, Copenhagen, Denmark

Mikhail N. Kosiborod M.D., Saint Luke's Mid America Heart Institute and University of Missouri-Kansas City, Kansas City, MO, USA

Anna Maria Langkilde M.D., BioPharmaceuticals R&D, AstraZeneca, Gothenburg, Sweden;

Felipe A. Martinez M.D., National University of Cordoba, Cordoba Argentina;

Piotr Ponikowski M.D. PhD, Wroclaw Medical University, Wroclaw, Poland;

Marc S. Sabatine M.D., TIMI Study Group, Cardiovascular Division Medicine, Brigham and Women's Hospital and Harvard Medical School, Boston, MA, USA;

Mikaela Sjöstrand M.D., BioPharmaceuticals R&D, AstraZeneca, Gothenburg, Sweden;

Scott D. Solomon M.D., Cardiovascular Division, Brigham and Women's Hospital, Boston, MA, USA

## SPONSOR LEADERSHIP

Anna Maria Langkilde, MD, PhD, BioPharmaceuticals R&D, AstraZeneca, Gothenburg, Sweden

Olof Bengtsson Ph Lic, BioPharmaceuticals R&D, AstraZeneca, Gothenburg, Sweden

Mikaela Sjöstrand, MD PhD, BioPharmaceuticals R&D, AstraZeneca, Gothenburg, Sweden

Kinga Kazanowska, BioPharmaceuticals R&D, AstraZeneca, Warsaw, Poland

Mikael Forsby, BioPharmaceuticals R&D, AstraZeneca, Gothenburg, Sweden

Ywonne Fox, BioPharmaceuticals R&D, AstraZeneca, Gothenburg, Sweden

## DATA MONITORING COMMITTEE

Marc A. Pfeffer, MD, PhD (Chair), Brigham and Women's Hospital, Harvard Medical School, Boston, MA, USA

Brian Claggett, PhD (Statistician), Brigham and Women's Hospital, Harvard Medical School, Boston, MA, USA

Karl Swedberg, MD, PhD, SWEKA AB, Gothenburg, Sweden

Jean L. Rouleau, MD, Montreal Heart Institute, Montreal, Quebec, Canada

Nish Chaturvedi, MD, Institute of Cardiovascular Science, University College London, London UK

Peter Ivanovich, MD, Feinberg School of Medicine, Northwestern University, Chicago, IL, USA

Andrew S. Levey, MD, Tufts University School of Medicine; Boston, MA, USA

Stuart Pocock, PhD (Statistician), London School of Hygiene and Tropical Medicine, London, UK

Heidi Christ-Schmidt, MSE (Statistician) Statistics Collaborative, Washington DC, USA

#### CLINICAL EVENT ADJUDICATION COMMITTEE

Claes Held, MD, PhD (Chair), Uppsala University Hospital, Uppsala, Sweden

Christina Christersson, MD, PhD (Co-chair), Uppsala University Hospital, Uppsala, Sweden

Johannes Mann, MD (Co-chair), University of Erlangen-Nürnberg, Munich, Germany

Christoph Varenhorst, MD (Co-chair) Uppsala University Hospital, Uppsala, Sweden

#### DKA ADJUDICATION COMMITTEE

Christian Ruff, MD (Chair), TIMI Study Group, Brigham and Women's Hospital, Boston, MA USA

Sara Alexanian, MD, Boston Medical Center, Boston MA USA

Rhonda Bentley-Lewis, MD, Massachusetts General Hospital, Boston, MA, USA

Rajesh Garg, MD, University of Miami Miller School of Medicine, Miami, FL, USA

Marie McDonnell, MD, Brigham and Women's Hospital, Boston, MA, USA;

## NATIONAL LEAD INVESTIGATORS

Mirta Diez, MD, Cardiovascular Institute of Buenos Aires, Argentina

Jose Carlos Nicolau, MD, PhD, Heart Institute (InCor), University of São Paulo Medical School, Brazil

Tzvetana Katova, MD, PhD, National Hospital of Cardiology, Sofia, Bulgaria

Jonathan Howlett MD, University of Calgary and Libin Cardiovascular Institute, Calgary, Canada

Eileen O'Meara, MD, Montreal Heart Institute, Department of Medicine, Canada

Subodh Verma, MD, PhD, Division of Cardiac Surgery, Li Ka Shing Knowledge Institute of St Michael's Hospital, University of Toronto, Canada

Junbo Ge, MD, Shanghai Institute of Cardiovascular Diseases, Zhongshan Hospital, Fudan University, Shanghai, China

Jan Belohlavek, MD, PhD, Department of Internal Medicine, Cardiovascular Medicine, General Teaching Hospital and 1st Faculty of Medicine, Charles University, Prague, Czech Republic

Morten Schou, MD, PhD, Department of Cardiology, Copenhagen University Hospital Herlev and Gentofte, Hellerup, Denmark

Michael Böhm, MD, Universitätsklinikum des Saarlandes, Klinik für Innere Medizin III, Universität des Saarlandes, Homburg/Saar, Germany

Bela Merkely MD, PhD, DSc, Heart and Vascular Center, Semmelweis University, Budapest, Hungary

Vijay Chopra, MD, Heart Failure Unit, Medanta Medicity, Gurugram, Haryana, India

Masahumi Kitakaze, MD, PhD (Department of Clinical Research and Development, National Cerebral and Cardiovascular Center, Suita, Japan

Rudolf De Boer, MD, PhD, University of Groningen, University Medical Center Groningen, Department of Cardiology, Groningen, the Netherlands

Jarosław Drożdż, MD, Department of Cardiology, Medical University of Łódź, Łódź, Poland

Sergey Tereshchenko, MD, PhD, Russian Cardiology Research and Production Complex and The Institute of Experimental Cardiology, Moscow, Russia

Andrej Dukát, MD, PhD, Second Department of Internal Medicine, Comenius University, Bratislava, Slovakia.

Charlotta Ljungman, MD, PhD, Department of Molecular and Clinical Medicine/Cardiology, Institute of Medicine, Sahlgrenska Academy, University of Gothenburg, Göteborg, Sweden.

Chern-En Chiang, MD, PhD, General Clinical Research Center and Division of Cardiology, Taipei Veterans General Hospital and National Yang-Ming University, Taipei, Taiwan

Mark Petrie, MD, British Heart Foundation Cardiovascular Research Centre, Institute of Cardiovascular and Medical Sciences, University of Glasgow, Glasgow, UK

Inder Anand MD, DPhil, Veterans Affairs Medical Center, Minneapolis, Minnesota, USA

Akshay Desai, MD, MPH, Cardiovascular Division, Brigham and Women's Hospital, Harvard Medical School, Boston, MA, USA

Mikhail Kosiborod, MD, Saint Luke's Mid America Heart Institute, Kansas, MO, United States of America; University of Missouri-Kansas City, Kansas, MO, USA

Pham Nguyễn Vinh, MD, PhD, Department of Cardiology, Tam Duc Hospital, Vietnam);

## LIST OF PRINCIPAL INVESTIGATORS BY COUNTRY

### Argentina:

S. Sassone, Centro Médico Dra. Maffei, CABA; D. Aizenberg, Centro Médico Viamonte, CABA; M. Talavera, Instituto Cardiovascular de Buenos Aires, CABA; G. Mercáu, Centro Modelo de Cardiología, San Miguel de Tucumán; D. Martínez, Instituto DAMIC Fundación Rusculleda, Córdoba; J. Albisu, Instituto Cardiovascular San Luis, San Luis; A. Hershsen, Fundación Favalaro, CABA; R. García Durán, Instituto de Investigaciones Clínicas San Nicolás, San Nicolás; M. Hominal, Centro de Investigaciones Clínicas del Litoral SRL, Santa Fe; N. Cluigt, Instituto de Investigaciones Clínicas Mar del Plata, Mar del Plata; F. Colombo Berra, Instituto Médico CER, Quilmes; E. Perna, Instituto de Cardiología de Corrientes "J.F.Cabral", Corrientes; R. Ahuad Guerrero, Corporación Médica San Martín, San Martín; D. García Brasca, Hospital Italiano de Córdoba, Córdoba; C. Zaidman, CIPREC, CABA; C. Majul, CEMEDIC, CABA; J. Taborda, Centro de Investigaciones Médicas Mar del Plata, Mar del Plata; H. Luquez, Centro Médico Luquez, Córdoba; J. Sala, Instituto de Investigaciones Clínicas Rosario, Rosario; A. Sosa Liprandi, Sanatorio Güemes, CABA; G. Cursack, Sanatorio Esperanza, Esperanza; O. Montaña, Clínica Privada DIM, Ramos Mejía; A. Fernández, Instituto de Investigaciones Clínicas Quilmes, Quilmes; M. Najenson, Centro de Atención e Investigación Clínica Integral, Rosario; S. Nani, Clínica Olivos, Vicente López; G. Caruso, Hospital Ramos Mejía, CABA; E. Fairman, Clínica Bazterrica, CABA; S. Pereiro González, Complejo Médico-Policía "Churrucá-Visca", CABA

### Brasil:

L. Maia, Hospital de Base São José do Rio Preto, São José do Rio Preto; A. Pereira, Hosp. Clínicas de Porto Alegre, Porto Alegre; P. Rossi, Núcleo de Pesquisa Clínica S/S, Curitiba; D. Precoma, Sociedade Hospitalar Angelina Caron, Campina Grande do Sul; F. Neuenschwander, Hospital Vera Cruz, Belo Horizonte; G. Reis, Cardioresearch Cardiologia Assistencial e de Pesquisa, Belo Horizonte; F. Guimaraes, ICM Instituto do Coração de Marília, Marília; J. Saraiva, Instituto de Pesquisa Clínica de Campinas, Campinas; F. Arantes, EuroLatino Medical Research, Uberlândia; M. Hernandez, Santa Casa de Misericórdia de Votuporanga, Votuporanga; J. Borges, Clínica de Endocrinologia e Metabologia Ltda, Brasília; B. Paolino, CCBR Centro de Pesquisa Clínica, Rio de Janeiro; E. Vasconcellos, CCBR Brasília, Brasília; E. Manenti, Hospital Mãe de Deus, Porto Alegre; P. Pimentel, Hospital Nossa Senhora da Conceição, Porto Alegre; P. Leaes, Irmandade Santa Casa de Misericórdia de Porto Alegre, Porto Alegre; S. Rassi, Hospital das Clínicas da Universidade Federal de Goiás, Goiânia; T. Dalcoquio, Instituto do Coração da HC FMUSP, São Paulo

### Bulgaria:

T. Katova, MHAT National Cardiology Hospital EAD, Sofia; D. Avramov, National Cardiology Hospital, Clinic of Cardiology, Sofia; N. Spasova, UMHAT Tsaritsa Yoanna - ISUL, Clinic of Cardiology, Sofia; D. Raev, MHAT Sveta Anna AD, Sofia; B. Chompalova, MHAT - Plovdiv, Department of Cardiology, Plovdiv; M. Milanova, UMHATEM N. I. Pirogov, Clinic of Cardiology, Sofia; M. Tokmakova, UMHAT 'St. Georgi', Cl. of Cardiology, Plovdiv; N. Runev, UMHAT Aleksandrovska EAD, Clinic of prop. in internal diseases, Sofia; A. Mihov, MHAT "Sveta Ekaterina", Department of internal diseases, Dimitrovgrad; A. Gogov, MHAT Haskovo AD, Haskovo; A. Dincheva, MC Avicena, Cardiology office, Sofia; N. Iliev, MHAT Sveti Pantaleimon - Pleven, Department internal dis, Pleven; B. Kolomanov, MC Medi city 21 OOD, Kyustendil; Y. Ivanova, DCC "Focus 5 - LZIP" EOOD, Cardiology office, Sofia; K. Ilieva, MHAT Blagoevgrad, Blagoevgrad; D. Karageorgiev, MHAT Sveta Karidad EAD, Plovdiv; I. Efremov, DCC 1 Lom, Lom; N. Botushanov, MHAT Med Line Clinic AD, Plovdiv; S. Vladeva, UMHAT Kaspela EOOD, Plovdiv

Canada:

C. Constance, Clinique Sante Cardio MC , Montreal; S. Vizel, Saul Vizel Professional Medicine Corporation , Cambridge; A. Pandey, Cambridge Cardiac Care Centre, Cambridge; D. Phaneuf, CISSS de Lanaudiere - Hopital Pierre Le Gardeur, Terrebonne; S. Mehta, Hamilton Health Sciences General Site, Hamilton; D. Rupka, Fraser Clinical Trials Inc, New Westminster; Y. Pesant, St-Jerome Medical Research Inc, Saint-Jerome; P. Poirier, L'Institut de cardiologie et de pneumologie de Quebec, Quebec; R. Chehayeb, Viacar Recherche Clinique Inc , Greenfield Park; M. Babapulle, Mohan Babapulle Medicine Professional Corporation, Waterloo; E. O'Meara, Institut de Cardiologie de Montréal, Montreal; J. Howlett, University of Calgary, Calgary; L. Yao, The Office of Dr. Louis Yao, York; R. McKelvie, London Health Sciences Centre, London; S. Verma, North York Diagnostic and Cardiac Centre, North York; M. Hartleib, Kawartha Cardiology Clinical Trials, Peterborough; R. Vijayaraghavan, Heart Health Institute, Scarborough; J. Vyselaar, The Medical Arts Health Research Group, North Vancouver; F. Azzari, CISSS du Bas-Saint-Laurent/Hôpital Régional de Rimouski, Rimouski ; J. Cha, Dr James Cha, Oshawa; F. Nasser-Sharif, Farah Nasser-Sharif Medicine Professional Corporation, Port Perry; T. Z. Maung, Dr. Tun Zan Maung Inc., Abbotsford; S. Mansour, Centre Hospitalier de l'Université de Montreal, Montreal; Y. Khaykin, Partners of Advanced Cardiac Evaluation (PACE), Newmarket; R. Lee, Dr Georges-L. Dumont University Hospital Centre, Moncton; P. Fong, Horizon Health Network, Saint John

China:

H. Jiang, Zhongshan Hospital Fudan University, Shanghai; X. Li, Jiangsu Province Hospital, Nanjing; L. Fu, The First affiliated Hospital of Haerbin Medical University, Haerbin; Y. Li, Shanghai East Hospital, Shanghai; D. Wang, Chifeng Hospital, Chifeng; Q. Zhao, Ruijing hospital Shanghai Jiaotong University of medicine, Shanghai; Y. Dong, 1st Affiliated Hospital of Sun Yat-Sen University, Guangzhou; Y. Zhou, Yangpu Hospital, Tongji University, Shanghai; X. Lin, The fifth affiliated hospital Sun YAT-SEN university, Zhuhai; J. Dong, Beijing Anzhen Hospital, Capital Medical University, Beijing; X. Zhang, Zhongda Hospital Southeast University, Nanjing; Z. Zheng, 1st Affiliated Hospital of Nanchang University, Nanchang; W. Huang, The Jiangxi Pingxiang People's Hospital, Pingxiang; Y. Gu, PuAi Hospital of Wuhan City, Wuhan; J. Liu, 1st hospital of Dalian Medical University, Dalian; X. Guo, Lanzhou University Second Hospital, Lanzhou; L. Wu, General Hospital of Ningxia Medical University, Yinchuan; Q. Tang, People's Hospital of Wuhan University, Wuhan; D. Peng, ZhongNan Univ 2nd Xiangya Hosp, Changsha; W. Dong, The Chinese PLA general hospital, Beijing; Y. Liang, The 2nd Hospital of Tianjin Medical University, Tianjin; D. Wang, Shanghai Putuo District Center Hospital, Shanghai; Z. Li, The people's hospital of Liaoning province, Shenyang; X. Lin, The First Affiliated Hospital of Baotou Medical College, Inn, Baotou; X. Zhang, Jilin Province people's hospital, Changchun; Z. Wang, The Affiliated Hospital of Xuzhou Medical College, Xuzhou; B. Han, Xuzhou Central hospital, Xuzhou; C. Wu, Peking University Shenzhen Hospital, Shenzhen

Czech Republic:

J. Belohlavek, Vseobecna fakultni nemocnice, Praha 2; J. Slaby, Oblastni nemocnice Kolin, Kolin; J. Spinar, Fakultni nemocnice Brno-Bohunice, 1.interni kardioklinika, Brno; P. Hajek, Fakultni nemocnice Motol, Praha 5; L. Busak, KardioBusak s.r.o., Louny; J. Carda, KARDIO s.r.o., Trebic; L. Spinarova, Fakultni nemocnice u Sv. Anny Brno, Brno; I. Malek, Institut klinicke a experimentalni mediciny, kardiologie, Praha 4; J. Skopek, Fakultni Thomayerova nemocnice s poliklinikou, Praha; R. Kuchar, Innera s.r.o., Benesov; E. Krcova, Axon Clinical s.r.o., Praha 5; O. Mayer Jr., FN Plzen, II. Interna, Centrum preventivni kardiologie, Plzen; D. Kucera, Pedicor Care s.r.o., Ostrava-Dubina

#### Denmark:

M. Schou, Herlev Hospital, Herlev; L. Køber, Rigshospitalet, København Ø; K. Egstrup, OUH Svendborg Sygehus, Svendborg; J. Hove, Hvidovre Hospital, Hvidovre; G. Gislason, Gentofte Hospital, Hellerup; L. Videbæk, Odense Universitetshospital, Kardiologisk afdeling B, Odense C

#### Germany:

M. Böhm, Universitaetsklinikum des Saarlandes, Homburg; R. Nischik, Medamed GmbH, Leipzig; N. Toursarkissian, Praxis Dr. med. Nicole Toursarkissian, Berlin; K. Appel, B.Braun Ambulantes Herzzentrum Kassel MVZ GmbH, Kassel; E. Schmidt, Cardiologicum Hamburg, Hamburg; I. Weigmann, Universitätsstudienzentrum für Stoffwechselerkrankungen, Dresden; M. Kellerer, Marienhospital Stuttgart, Stuttgart; A. Al-Zoebe, Praxis Dr. Al-Zoebe, Wermsdorf; U. Stephan, Medizinisches Versorgungszentrum am Bahnhof Spandau, Berlin; A. Wilke, Kardiologische Gemeinschaftspraxis Papenburg, Papenburg; S. Genth-Zotz, Katholisches Klinikum St. Vincenz- und Elisabeth- Hospital, Mainz; G. Simonis, Zentrum für klinische Prüfungen, Dresden; D. Tschöpe, Herz- und Diabeteszentrum NRW, Bad Oeynhausen; A. Costard-Jäckle, Herz- und Diabeteszentrum NRW, Bad Oeynhausen

#### Hungary:

B. Merkely, Semmelweis Egyetem, Városmajori Szív és Érgyógyászati Klinika, Budapest; P. Andrassy, Bajcsy-Zsilinszky Kórház és Rendelőintézet, Budapest; E. Noori, Fejér Megyei Szent György Kórház, Székesfehérvár; Z. Járαι, Szt. Imre I. Bel., Budapest; F. Poór, Karolina Kórház-Rendelőintézet, Mosonmagyaróvár; C. Király, Bács-Kiskun Megyei Kórház SzTE ÁOK Oktató Kórháza, Kecskemét; A. Czigány, XIII kerületi Egészségügyi Szolgálat Közhasznú Nonprofit Kft, Budapest; L. Nagy, Csongrád Megyei Dr Bugyi István Kórház, Szentes; Á. Motyovszki, WM-MED Kft, Zalaegerszeg; G. Masszi, Nyírő Gyula Kórház - OPAI, Budapest

#### India:

V. Mehta, G.B. Pant Hospital, New Delhi; V. Chopra, Medanta-The Medicity, Gurgaon; A. Naik, Care Institute of Medical Sciences, Ahmedabad; M. Gadkari, K. E. M. Hospital, Pune; R. Sawant, Noble Hospital, Maharashtra; M. Mahapekar, DDMM Heart Institute, Nadiad; S. Karna, Bhanubhai & Madhuben Patel Cardiac Centre, Karamsad; M. Deshpande, Government Medical College, Nagpur; V. Bhargava, Ganga Care Hospital, Nagpur; V. Kothiwale, KLES Dr. Prabhakar Kore Hospital & M.R.C, Belagavi; J. Menon, Sree Narayana Institute of Medical Sciences, Ernakulam; D. Sinha, Institute of Post Graduate Medical Education & Research, Kolkata; S. Sinha, LPS Institute Of Cardiology, Kanpur; H. Kokane, B.J. Govt. Medical College and Sassoon General Hospital, Pune; P. Udgire, Mahatma Gandhi Mission Medical College, Aurangabad; M. Sandhu, Artemis Hospitals, Gurgaon

#### Japan:

M. Suzuki, National Hospital Organization Saitama National Hospital, Wako-shi; M. Nishino, Osaka Rosai Hospital, Sakai-shi, Kita-ku; A. Kiyosue, Tokyo Eki Center-Building Clinic, Chuo-ku; K. Sumii, Mazda Hospital of Mazda Motor Corporation, Aki-gun.; S. Suzuki, KKR Tohoku Kosai Hospital, Sendai-shi; Y. Noguchi, Tsukuba Medical Center, Tsukuba-shi; S. Tanaka, Shonan Fujisawa Tokushukai Hospital, Fujisawa-shi; H. Takase, JA Shizuoka Koseiren Enshu Hospital, Hamamatsu-shi; M. Mohri, JCHO Kyushu Hospital, Kitakyusyu-shi; S. Higashiue, Kishiwada Tokushukai Hospital, Kishiwada-shi; N. Fujimoto, National Hospital Organization Beppu Medical Center, Beppu-shi; H. Iseki, Agricultural Cooperatives, Sagamihara Kyodo Hospital, Sagamihara-shi; T. Kuramochi, Kioroshikai Chibanishi General Hospital, Matsudo-shi; T. Shibasaki, Social Medical Corporation Sayama General Clinic, Sayama-shi; H. Tsutsui, Japanese Red Cross Suwa Hospital, Suwa-shi; Y. Takagi, Federation of National Public Service Takamatsu Hospital, Takamatsu-shi; Y. Katayama, National Hospital Organization Iwakuni Clinical Center, Iwakuni-shi; N. Takeyasu, Ibaraki Prefectural Central Hospital, Kasama-shi; T. Anzai, National Cerebral and Cardiovascular Center Hospital, Suita-

shi; H. Nagashima, Shinjuku Research Park Clinic, Shinjuku-ku; A. Kimura, Meijo Hospital, Nagoya-shi; T. Kakuta, Tsuchiura Kyodo General Hospital, Tsuchiura-shi; T. Hashimoto, Takeda General Hospital, Kyoto-shi; H. Sugino, NHO Kure Medical Center and Chugoku Cancer Center, Kure-shi; K. Saito, Nishiarai Heart Center Hospital, Adachi-ku; S. Hiroi, National Hospital Organization Takasaki General MC, Takasaki-shi; H. Kamiya, Japanese Red Cross Nagoya Daiichi Hospital, Nagoya-shi; K. Fukui, Kanagawa Cardiovascular and Respiratory Center, Yokohama-shi; S. Matsuoka, Seikeikai New Tokyo Heart Clinic, Matsudo-shi; K. Moritani, KKR Tachikawa Hospital, Tachikawa-shi; Y. Tomobuchi, Seiyu Memorial Hospital, Wakayama-shi; Y. Hata, Minamino Cardiovascular Hospital, Hachioji-shi; R. Kawamura, Hitachi, Ltd. Hitachinaka General Hospital, Hitachinaka-shi; E. Hattori, JA Toride Medical Center, Toride-shi; K. Fujimoto, National Hospital Organization Kumamoto Medical Center, Kumamoto-shi; N. Takahashi, Matsuyama Shimin Hospital, Matsuyama-shi; W. Takahashi, National Hospital Organization Shinshu Ueda Medical Center, Ueda-shi; T. Kadokami, Saiseikai Futsukaichi Hospital, Chikushino-shi; H. Ueno, Medical corporation Okinawatokushukai, HAYAMA HEART CENTER, Miura-gun; S. Uchikawa, Japanese Red Cross Society Azumino Hospital, Azumino-shi; T. Shinozaki, National Hospital Organization Sendai Medical Center, Sendai-shi; Y. Onishi, Hiratsuka Kyosai Hospital, Hiratsuka-shi; N. Komiyama, St. Luke's International Hospital, Chuo-ku; S. Inoue, Iizuka Hospital, Iizuka-shi; Y. Momiyama, National Hospital Organization Tokyo Medical Center, Meguro-ku; Y. Ueda, National Hospital Organization Osaka National Hospital, Osaka-shi; Y. Komura, Taijukai Foundation Kaisei General Hospital, Sakaide-shi; T. Arakawa, Daido Clinic, Nagoya-shi; H. Meno, Japanese Red Cross Fukuoka Hospital, Fukuoka-shi; M. Higuchi, Mito Saiseikai General Hospital, Mito-shi; Y. Hayashi, Wakayama Rousai hospital, Wakayama-shi; K. Seki, Yamaguchi Rosai Hospital, Sanyoonoda-shi; K. Fujii, Sakurabashi Watanabe Hospital, Osaka-shi; K. Harada, Chubu Rosai Hospital, Nagoya-shi; A. Wada, Kusatsu general hospital, Kusatsu-shi; T. Kasai, Juntendo University Hospital, Bunkyo-ku; K. Kuwahara, Shinshu University Hospital, Matsumoto-shi; Y. Yasaka, Hyogo Brain and Heart Center, Himeji-shi; I. Uchida, Tokai Central Hospital of the Mutual Aid Association, Kakamigahara-shi; Y. Okumura, Nihon University Itabashi Hospital, Itabashi-ku; Y. Hisamatsu, JCHO Shimonoseki Medical Center, Shimonoseki-shi; T. Nunohiro, Nagasaki Harbor Medical Center, Nagasaki-shi; K. Tsukahara, Fujisawa City Hospital, Fujisawa-shi; A. Hirohata, The Sakakibara Heart Institute of Okayama, Okayama-shi; M. Asakura, Hyogo College of Medicine Hospital, Nishinomiya-shi

#### Netherlands:

R. De Boer, Universitair Medisch Centrum Groningen, Groningen; L. Bellersen, Universitair Medisch Centrum St. Radboud, Nijmegen; H. Swart, D&A Research & Genetics, Sneek; B. Groenemeijer, Gelre Ziekenhuis Apeldoorn, Apeldoorn; S. Zoet Nugteren, Ikazia Ziekenhuis, Rotterdam; C. De Nooijer, Maxima Medisch Centrum, Veldhoven; P. Nierop, Sint Franciscus Gasthuis, Rotterdam; R. Robles De Medina, HAGAZiekenhuis locatie Els Borst-Eilersplein, Den Haag; J. Van Eck, Jeroen Bosch Ziekenhuis, Den Bosch; M. Van Hessen, Groene Hart Ziekenhuis, locatie Bleuland, Gouda

#### Poland:

J. Drożdż, SPZOZ Uniwersytecki Szpital Kliniczny, Łódź; P. Miękus, NZOZ „PRO CORDIS” Sopockie Centrum Badań Kardiologicznych, Gdynia; R. Ściborski, Zespół Opieki Zdrowotnej w Oławie SP ZOZ, Oława; B. Mikłaszewicz, CARDIAMED Beata Mikłaszewicz i Dariusz Dabrowski S.J., Legnica; W. Sudnik, Centrum Medyczne Dr Sudnik s.c Wanda i Jerzy Sudnik, Sokółka; R. Marianowski, Centrum Usług Medycznych MaxMed Marek Maciaszek, Bochnia; R. Witek, Poradnia Chorób Metabolicznych w Wierzosławicach, Wierzosławice; G. Drelich, CenterMed Lublin Sp. z o. o., Lublin; E. Mirek-Bryniarska, Ewa Mirek-Bryniarska Specjalistyczna Praktyka Lekarska, Kraków; S. Szynal, Sławomir Szynal Indywidualna Praktyka Lekarska, Jasło; L. Pawłowicz, Praktyka Lekarska Lidia Pawłowicz, Toruń; J. Lampart, Centrum Medyczne Pratia Katowice, Katowice; R. Korzeniak, MEDIKARD Specjalistyczna Przychodnia Lekarska, Płock; J. Prokopczuk, Polsko-Amerykańskie Kliniki Serca, Kędzierzyn Koźle





#### Russian Federation:

S. Boldueva, St.Petersburg Mechnikov State Medical Academy, Saint-Petersburg; Y. Didenko, St.Petersburg City Multiservice Hospital #2, Saint-Petersburg; N. Dzhaiani, Moscow, City Hospital # 68, Moscow; L. Ermoshkina, Gatchina Central District Clinical Hospital, Gatchina; V. Kostenko, St. Pt. State Institution of Health "City polyclinic № 109", Saint-Petersburg; E. Vishneva, City Clinical Hospital 14, Ekaterinburg; N. Koziolova, Perm Regional Hospital for war veterans, Perm; S. Tereschenko, Russian Cardiology Research and Manufacturing Complex, Moscow; D. Pevzner, Russian Cardiology Research and Manufacturing Complex, Moscow; L. Krylova, Leningrad Regional Clinical Hospital, Saint-Petersburg; A. Chernyavsky, Meshalkin Research Institute of Blood Circulation Pathology, Novosibirsk; A. Kazakov, Tver Regional Hospital, Tver; S. Aksentiev, Ryazan Regional Hospital, Ryazan; R. Nilk, City Hospital #38 n.a. N.A.Semashko, Saint Petersburg; Z. Paltzman, Medical Research Institute, St. Petersburg; A. Galyavich, Kazan State Medical University, Kazan; A. Maltcev, Consultation Diagnostic Center 85, Saint Petersburg; P. Kopylov, First MSMU n.a. I.M.Sechenov based on University clin hosp 1, Moscow; A. Ezhov, Izhevsk City Clinical Hospital № 9, Izhevsk; J. Shilko, Sverdlovsk Regional Clinical Hospital #1, Yekaterinburg

#### Slovakia:

L. Antalík, Nemocnica s poliklinikou Brezno, n.o., Brezno; V. Bugan, MEDIVASA, s.r.o, Nemocnica s poliklinikou, Zilina; P. Fulop, Interna SK, s.r.o., Svidník; L. Jamrisková, KVC-KARDIOVASKULARNE CENTRUM, s.r.o., Martin; D. Kollarova, Ambulancia pre diabetologiu, DK ORTOPEDIA, s.r.o., Nove Zamky; V. Macek, Kardiologická ambulancia, Trnava; M. Slovenska, Interna a diabetologická ambulancia, Kosice; L. Tomasova, Interna a diabetologická ambulancia IN-DIA s.r.o., Lucenec; D. Vinanska, Interna ambulancia, Medispol sro, Presov; R. Smik, MEDIKARD sro, Presov; J. Selecky, Kardiologická ambulancia, Sciens s.r.o., Trebisov; I. Majercak, Medical group Kosice s.r.o, Kosice; P. Olexa, Kardiologická a interna ambulancia, Kosice

#### Sweden:

C. Ljungman, Sahlgrenska Universitetssjukhuset, Göteborg; A. Hedman, Södersjukhuset AB, Kardiologkliniken, Stockholm; C. Lindholm, Hjärtmottagningen, Capió Citykliniken, Lund; K. Lindmark, Norrlands Universitetssjukhus NUS, Umeå; T. Moos, Östersunds Hospital, Östersund

#### Taiwan:

C. Chiang, General Clinical Research Center, Taipei Veterans General Hospital, Taipei; L. Lin, National Taiwan University Hospital, Department of Cardiology, Taipei; M. Liu, MacKay Memorial Hospital-HsinChu, Hsinchu; K. Chang, China Medical University Hospital- Cardiovascular Department, Taichung; C. Hsia, Clinical Research Center, Changhua Christian Hospital, Changhua City; J. Shih, Chi Mei Medical Center, Tainan; P. Liu, National Cheng Kung University Hospital, Tainan; T. Lin, Kaohsiung Medical University Hospital, Kaohsiung; H. Chang, Cheng Hsin General Hospital, Taipei; J. Huang, Veterans General Hospital Taichung, Taichung; I. Hsieh, Dep of Cardiology, Chang Gung Memorial Hospital - Linkou, Kweishan Shiang; C. Wu, National Taiwan University Hospital - Hsinchu branch, Hsinchu; W. Tseng, Department of Internal Medicine, E-Da University Hospital, Kaohsiung

#### United Kingdom:

M. Petrie, New Lister Building, Glasgow; R. Gardner, Golden Jubilee National Hospital, Clydebank; A. Clark, Castle Hill Hospital, Cottingham; A. Japp, Royal Infirmary of Edinburgh at Little France, Edinburgh; P. Jhund, Queen Elizabeth University Hospital, Glasgow; C. Lang, Division of Molecular & Clinical Medicine, Dundee; S. Leslie, Research, Development and Innovation Dept, Inverness; C. Murphy, Royal Alexandra Hospital, Paisley; C. Petrie, NHS Lanarkshire - Monklands Hospital, Airdrie; J. Walsh, Nottingham City Hospital, Nottingham

United States:

A. Arif , AA MRC LLC, Flint, MI; D. Avino, Empirican PRN, Orchard Park, NY; S. Banerjee, Comprehensive Cardiovascular Medical Group, Bakersfield, CA; M. Kanwar, Allegheny General Hospital, Pittsburgh, PA; M. Berk, Cardiovascular Research Inst of Dallas, Dallas, TX; C. Brown, Mobile Heart Specialists PC, Mobile, AL; C. Ince Jr., Maryland Cardiovascular Specialists, Baltimore, MD; T. Lewis, East Coast Institute for Research, LLC, St. Augustine, FL; A. Nikfarjam, Sanitas Research, Miami, FL; J. Patel, California Heart Center, Beverly Hills, CA; K. Ramanathan, VAMC Memphis, Memphis, TN; A. Schabauer, Black Hills Cardiovascular Research, Rapid City, SD; T. Greene, East Coast Institute for Research, Jacksonville, FL; K. Shah, 1200 East Broad Street - West Hospital, Richmond, VA; R. Sotolongo, Southeast Texas Clinical Research Center, Beaumont, TX; A. Viera, Nova Clinical Research Center LLC, Miami, FL; O. Akinboboye, Laurelton Heart Specialists PC, Rosedale, NY; A. Arouni, VA Medical Center - NE, Omaha, NE; B. Bertolet, Cardiology Associates of North Mississippi, Tupelo, MS; L. Chandra, Chicago Medical Research, LLC, Hazel Crest, IL; T. Cimato, Buffalo General Hospital, Buffalo, NY; S. Deleon, Urban Health Plan Inc, Bronx, NY; M. Bennett, Allina Health System, dba Abbott Northwestern Hospital, Minneapolis, MN; F. Franchi, University of Florida, Jacksonville, FL; G. Hamroff, NYPMG Hudson Valley Cardiology, Cortlandt Manor, NY; D. Hotchkiss, Peace River Cardiovascular Center, Port Charlotte, FL; M. Jardula, Desert Oasis Healthcare (Desert Medical Group Inc), Palm Springs, CA; J. Javier, Advanced Research for Health Improvement, LLC, Naples, FL; N. Kazemi, Palm Research Center, Inc, Las Vegas, NV; J. Kostis, Rutgers University , New Brunswick, NJ; J. Lash, Norton Cardiovascular Associates, Louisville, KY; L. Levinson, Tipton Medical Center, Altoona, PA; I. Lieber, Texas Cardiology Research Center, PLLC, Kingwood, TX; E. Lo, Central Florida Medical Research, LLC, New Smyrna Beach, FL; S. Mahal, Advanced Heart Care, LLC, Bridgewater, MA; R. Manshadi, Manshadi Heart Institute Inc, Stockton, CA; F. Mody, VA Greater Los Angeles Healthcare System/West LA VA Medical, Los Angeles, CA; A. Paraschos, Kernodle Clinic Department of the Private Diagnostic Clinic, Burlington, VT; M. Pursley, Heart Group of the Eastern Shore PC, Fairhope, AL; G. Hickey, VA Pittsburgh Healthcare System, Pittsburgh, PA; J. Londono, Broward Research Group, Pembroke Pines, FL; D. Singal, Cardio Metabolic Institute, Somerset, NJ; S. Srivastava, Pentucket Medical-Haverhill, Haverhill, MA; J. Teel, Brooke Army Medical Center, Fort Sam Houston, TX; J. Castriz, Great Falls Clinic, LLP, Great Falls, MT; L. Kantaros, Hudson Valley Cardiovascular Practice PC, Poughkeepsie, NY; C. Venugopal, Cardiology Partners Clinical Research Institute, Wellington, TX; C. Staniloae, NYU Langone Medical Associates, New York, NY; D. Gupta, Tennessee Center for Clinical Trials, Tullahoma, TN; F. Syed, SYED RESEARCH CONSULTANTS LLC - MULTI SPECIALITIES, Sheffield, AL; M. Zacharias, University Hospitals Cleveland Medical Center, Cleveland, OH; N. Jaffrani, Alexandria Cardiology Clinic, Alexandria, VA; P. Wakefield, PMG Research of Knoxville, Knoxville, TN; M. Nassif, Saint Luke's Mid America Heart Institute, Kansas City, MO; T. Haddad, Virginia Heart, Falls Church, VA; S. Iskander, Cardiovascular Associates of East TX Research, Tyler, TX; G. Lewis, Massachusetts General Hospital, Boston, MA; B. Al-Joundi, Gateway Cardiovascular Research Center, Inc, St. Louis, MO; W. French, UCLA, Torrance, CA; M. Ogunniyi, Emory Univ, Atlanta, GA; S. Emani, Ohio State University, Columbus, OH; S. Weiss, Virginia Mason Medical Center, Seattle, WA; R. Cheng, University of Washington School of Medicine, Seattle, WA; V. Florea, Minneapolis VA Medical Center, Minneapolis, MN; S. Joseph, Baylor University Medical Center, Dallas, TX; D. Gupta, Vanderbilt University Medical Center, Nashville, TN; S. Lederman, Altus Research, Lake Worth, FL; J. Izzo, Erie County Medical Center, Buffalo, NY; M. Bernstein, Louisiana Heart Center, Chalmettem, LA; E. Fruehling, Nebraska Specialty Network, LLC, dba Nebraska Heart Institute, Grand Island, NE; B. Foley, Advanced Cardiovascular LLC, Alexander City, AL; L. Younis, Gateway Cardiovascular Research Center, Inc, Jerseyville, IL; D. Song, Atlanta Heart Specialists LLC, Tucker, GA

Vietnam:

V. Pham, Tam Duc hospital, Ho Chi Minh; H. Nguyen, Cardiology dept - Gia Dinh People Hospital, Ho Chi Minh; H. Do, HCMC Heart Institute, HCMC; B. Truong, UMC, Ho Chi Minh; H. Nguyen, Saint Paul Hospital - Out Patient Clinic, Hanoi; T. Nguyen, Hanoi Heart Hospital- Trần Hưng Đạo, Hanoi; H. Nguyen, Hanoi Heart Hospital- Lạc Long Quân, Hanoi; D. Ho, Thong Nhat Hospital, Cardiology Toracic dept., Ho Chi Minh
